# Supplementary material for: Clinical Prediction of Type 2 Diabetes Mellitus (T2DM) via Anthropometric and Biochemical Variations in Prakriti
Source: MDPI journal article supplement (doi:10.3390/diseases10010015), 2022-03-03
Supplement: s1 [file s1]

## **Clinical prediction of type 2 diabetes mellitus (T2DM) via anthropometric and biochemical variations in *Prakriti***

Shriti Singh<sup>1\*</sup>, Neeraj Kumar Agrawal<sup>2</sup>, Girish Singh<sup>3</sup>, Sangeeta Gehlot<sup>1</sup>, Santosh Kumar Singh<sup>4</sup>, Rajesh Singh<sup>4\*</sup>

### **Affiliations:**

<sup>1</sup> Department of Kriya Sharir, Faculty of Ayurveda, Institute of Medical Sciences, Banaras Hindu University, Varanasi 221005, Uttar Pradesh, India; sangeetagehlot@gmail.com

<sup>2</sup> Department of Endocrinology and Metabolism, Institute of Medical Sciences, Banaras Hindu University, Varanasi 221005, Uttar Pradesh, India; drnkavns@gmail.com

<sup>3</sup> Centre of Biostatistics, Institute of Medical Sciences, Banaras Hindu University, Varanasi 221005, Uttar Pradesh, India; drgirishsingh@yahoo.com

<sup>4</sup> Department of Microbiology, Biochemistry, and Immunology, Cancer Health Equity Institute, Morehouse School of Medicine, 720 Westview Drive SW, Atlanta, GA 30310, USA; sksingh@msm.edu

\*Correspondence: singhshriti@gmail.com (S.S.); rsingh@msm.edu (R.S.); Tel: +1-404-756-6661 (R.S.); Fax: +1-404-752-1179 (R.S.)

**Table S1:** Overview of *Prakriti* assessment tool***PRAKRITI PARIKSHA***

| <i>Vata</i>                                                                                                              | <i>Pitta</i>                                                                                                                                                                                       | <i>Kapha</i>                                                                                                              |
|--------------------------------------------------------------------------------------------------------------------------|----------------------------------------------------------------------------------------------------------------------------------------------------------------------------------------------------|---------------------------------------------------------------------------------------------------------------------------|
| 1. Your body is lean and thin<br>2. In your body, veins are prominent                                                    |                                                                                                                                                                                                    | 1. You have a well-built body<br>2. You have long arms<br>3. You have a well-developed chest<br>4. Your forehead is broad |
| 3. The colour of your skin is black or blackish red<br>4. Your skin is dry<br>5. Your skin has a tendency to be cracked. | 1- The colour of your skin is fair or coppery<br>2. Your body temp generally remains in the higher range of normal<br>3. Your skin has moles and freckles                                          | 5. The colour of your skin is fair<br>6. Body temp in the lower range of normal<br>7. Your skin is smooth                 |
| 6. Your hair is dry<br>7. Your hair has a tendency to be Cracked<br>8. Your hair is scarcely placed                      | 4. Your hair is soft<br>5. Your hair has a yellowish tinge<br>6. Your hair is scarcely placed<br>7. You are suffering from premature greying of hairs<br>8. You are suffering from early hair fall | 8. Your hair is black<br>9. Your hair is strong<br>10. Your hair is soft<br>11. Your hair is curly                        |
| 9. Your nails are not smooth<br>10. Your nails are easily broken                                                         | 9. Your nails are copper coloured                                                                                                                                                                  | 12. Your nails are whitish                                                                                                |
| 11. Your extremities (palm and sole) have a tendency to be cracked                                                       | 10. Your extremities are not compact                                                                                                                                                               | 13. Your extremities are well developed                                                                                   |

|                                                                                                                                                                                             |                                                                                                                        |                                                                                                                     |
|---------------------------------------------------------------------------------------------------------------------------------------------------------------------------------------------|------------------------------------------------------------------------------------------------------------------------|---------------------------------------------------------------------------------------------------------------------|
| <p>12. Your joints are not well covered with muscles</p> <p>13. Your joints produce sound during movement</p>                                                                               | <p>11. Your joints are loose</p>                                                                                       | <p>14. Your joints are well developed and covered with muscles</p>                                                  |
| <p>14. Your eyes are small</p> <p>15. Your eyes are dusky</p> <p>16. Your eyes remain open during sleep</p>                                                                                 | <p>12. Your eyes become red when exposed to the sun</p>                                                                | <p>15. Your eyes are whitish</p> <p>16. You have long eyelashes</p>                                                 |
| <p>17. When you move with your friends, they lag behind you.</p>                                                                                                                            |                                                                                                                        | <p>17. When you move with your friends, you lag behind them.</p>                                                    |
| <p>18. Does your voice is considered unpleasant.</p>                                                                                                                                        | <p>13. Do you feel difficulty in pronunciation.</p>                                                                    | <p>18. Does your voice is considered pleasant.</p>                                                                  |
| <p>19. You are more talkative among your friends</p> <p>20. When you have been asked some questions, you start with something else and come to the point instead of directly answering.</p> | <p>14. During the discussion, if individuals disagree with you, they become angry.</p>                                 | <p>19. During the discussion, you speak on any topic</p> <p>1. After long thinking</p> <p>2. Avoid harsh words.</p> |
| <p>21. Sometimes you feel hungry and sometimes not</p> <p>22. Sometimes you feel that meal is digested properly and sometimes not.</p>                                                      | <p>15. You always feel that you are very much hungry at mealtime</p> <p>16. Your food is always digested properly.</p> | <p>20. You do not feel much hungry at mealtime</p> <p>21. Your food is not properly digested.</p>                   |
| <p>23. You consume food materials in small quantity</p> <p>24. Your frequency of food intake is more</p>                                                                                    | <p>17. You are not able to tolerate hunger</p> <p>18. You consume a large quantity of food</p>                         | <p>22. You can tolerate hunger.</p>                                                                                 |
| -                                                                                                                                                                                           | <p>19. You feel increased thirst and consume an excessive quantity of water.</p>                                       | <p>23. You feel thirsty not so often.</p>                                                                           |

|                                                                                     |                                                                                  |                                                                                 |
|-------------------------------------------------------------------------------------|----------------------------------------------------------------------------------|---------------------------------------------------------------------------------|
| -                                                                                   | 20. You suffer from excess sweat.<br>21. Your sweat is foul-smelling             | -                                                                               |
| 25. You are frequently constipated and pass hard and dried stool                    | 22. You pass a large quantity of stool<br>23. You pass a large quantity of Sweat | 24. You pass less quantity of stool<br>25. You pass less quantity of sweat      |
|                                                                                     | 24. You pass an excessive quantity of urine                                      | 26. You pass less quantity of urine                                             |
| 26. You desire to eat hot food                                                      | 25. You desire to eat cold food                                                  | 27. You desire to eat hot food                                                  |
| 27. You do not tolerate the winter season.                                          | 26. You do not tolerate the summer season.                                       | 28. You do not tolerate the winter season.                                      |
| 28. You like to eat food having<br>1-sweet<br>2-sour<br>3- salty taste              | 27. You like to eat food having<br>1-sweet<br>2- bitter<br>3-astringent taste.   | 29. You like to eat food having<br>1-spicy<br>2- bitter<br>3 -astringent taste. |
| 29. You feel exhausted after light exertion.                                        | 28. You feel exhausted after moderate exertion.                                  | 30. You do not feel exhausted even after heavy exertion.                        |
| 30. You frequently fall ill.                                                        | 29. Do you suffer more from an abscess, moles, freckles, etc.                    | 31. You do not frequently fall ill.                                             |
| 31. You have difficulty in falling asleep<br>32. Your sleep is disturbed many times |                                                                                  | 32. You tend to have a deep sleep.<br>33. You tend to sleep for long hours.     |

|                                                                                                                                                        |                                                                                        |                                                                                                       |
|--------------------------------------------------------------------------------------------------------------------------------------------------------|----------------------------------------------------------------------------------------|-------------------------------------------------------------------------------------------------------|
| 33. Whether you have a tendency to initiate the assigned work readily.                                                                                 |                                                                                        | 34. Whether you have a tendency to postpone the assigned work.                                        |
| 34. Do you have a tendency to collect others' belongings.<br><br>35. You are fearful in nature.<br>36. You tend to feel jealous about others' success. | 30. Do you get easily angry.<br><br>31. Do you feel confident most of the time.        | 35. Do you not get angry easily?                                                                      |
| 37. Your grasping power is good.                                                                                                                       | 32. You are considered intelligent.                                                    | 36. Your retaining capacity is better than grasping power.                                            |
| 38. You tend to forget things easily.                                                                                                                  |                                                                                        | 37. Your retention power is good.                                                                     |
| 39. You tend to become anxious while under stress.                                                                                                     | 33. You are not able to tolerate even mild stress.                                     | 38. You can tolerate even severe stress.                                                              |
| 40. You do not feel gratitude towards those who help you.                                                                                              | 34. You tend to show mercy even on your enemies too.                                   | 39. You feel highly grateful towards those who help you.                                              |
| 41. You have no faith in God.                                                                                                                          | 35. You have faith in God                                                              | 40. You have a strong faith in God.                                                                   |
| 42. You avoid participating in competitive events                                                                                                      | 36. You enthusiastically participate in all competitive events                         | 41. You enthusiastically participate in all competitive events                                        |
| 43. You frequently dream of flying, climbing mountains, trees, buildings, etc., during sleep.                                                          | 37. You frequently dream of fire, electric thundering, red forest, etc., during sleep. | 42. You frequently dream of ponds, lakes full of lotus and swan, clouds, rivers, and romantic scenes. |
| <b>Total Score.    Vata-</b>                                                                                                                           | <b>Pitta-</b>                                                                          | <b>Kapha-</b>                                                                                         |

**Table S2:** Comparison of *Kapha Prakriti* between individuals with diabetes and without diabetes

| Parameters                          | <i>Kapha Prakriti</i><br>individuals with<br>diabetes (n=60)<br>(mean±SD) | <i>Kapha Prakriti</i><br>individuals without<br>diabetes (n=40)<br>(mean±SD) | t-test | P-value          |
|-------------------------------------|---------------------------------------------------------------------------|------------------------------------------------------------------------------|--------|------------------|
| Height(cm)                          | 160.15 ± 10.17                                                            | 165.30 ± 6.52                                                                | 2.833  | <b>0.006</b>     |
| Weight(kg)                          | 71.00 ± 10.33                                                             | 67.57±10.05                                                                  | 1.644  | 0.103            |
| BMI(kg/m <sup>2</sup> )             | 27.68 ± 3.72                                                              | 24.73 ± 3.23                                                                 | 4.086  | <b>&lt;0.001</b> |
| Systolic Blood Pressure (mm of Hg)  | 123.58 ± 6.03                                                             | 114.98 ± 3.60                                                                | 8.104  | <b>&lt;0.001</b> |
| Diastolic Blood Pressure (mm of Hg) | 79.43±8.69                                                                | 76.45±3.75                                                                   | 2.044  | <b>0.044</b>     |
| Waist Hip Ratio(cm)                 | 0.96±0.054                                                                | 0.95±0.09                                                                    | 0.557  | 0.579            |
| Fasting Blood Sugar(mg/dl)          | 182.90 ± 77.70                                                            | 97.37 ± 7.96                                                                 | 6.925  | <b>&lt;0.001</b> |
| Post Prandial Blood Sugar(mg/dl)    | 289.63 ± 112.13                                                           | 123.16 ± 14.72                                                               | 9.320  | <b>&lt;0.001</b> |
| HDL(mg/dl)                          | 43.56 ± 7.73                                                              | 44.00 ± 4.24                                                                 | 0.325  | 0.746            |
| LDL(mg/dl)                          | 126.29±38.50                                                              | 98.53±19.84                                                                  | 4.199  | <b>&lt;0.001</b> |
| Triglyceride(mg/dl)                 | 164.09±69.29                                                              | 124.55 ±14.21                                                                | 3.554  | <b>0.001</b>     |
| Total Cholesterol(mg/dl)            | 188.91± 39.74                                                             | 164.56 ±18.39                                                                | 3.620  | <b>&lt;0.001</b> |
| Serum Creatinine (mg/dl)            | 0.99±0.32                                                                 | 0.80±0.08                                                                    | 3.727  | <b>&lt;0.001</b> |
| eGFR (mL/min/1.73m <sup>2</sup> )   | 77.40±26.26                                                               | 100.38±7.84                                                                  | 5.368  | <b>&lt;0.001</b> |

**Table S3.** Comparison of *Pitta Prakriti* between individuals with diabetes and without diabetes

| Parameters                          | <i>Pitta Prakriti</i><br>individuals with<br>diabetes (n=51)<br>(mean±SD) | <i>Pitta Prakriti</i><br>individuals without<br>diabetes (n=55)<br>(mean±SD) | t-test | P- value         |
|-------------------------------------|---------------------------------------------------------------------------|------------------------------------------------------------------------------|--------|------------------|
| Height(cm)                          | 158.22±7.25                                                               | 163.16±7.56                                                                  | 3.423  | <b>0.001</b>     |
| Weight(kg)                          | 63.69±11.47                                                               | 62.82±9.85                                                                   | 2.471  | <b>0.015</b>     |
| BMI (kg/m <sup>2</sup> )            | 25.52±4.45                                                                | 23.77±2.95                                                                   | 0.341  | 0.734            |
| Systolic Blood Pressure (mm of Hg)  | 135.14±16.22                                                              | 117.78±3.84                                                                  | 7.706  | <b>&lt;0.001</b> |
| Diastolic Blood Pressure (mm of Hg) | 82.12±10.19                                                               | 78.62±4.03                                                                   | 2.355  | <b>0.020</b>     |
| Waist Hip Ratio(cm)                 | 0.88±0.046                                                                | 0.95±.078                                                                    | 5.053  | <b>&lt;0.001</b> |
| Fasting Blood Sugar(mg/dl)          | 142.48±30.97                                                              | 90.78±8.17                                                                   | 11.945 | <b>&lt;0.001</b> |
| Post Prandial Blood Sugar(mg/dl)    | 219.85±63.88                                                              | 116.35±9.85                                                                  | 11.870 | <b>&lt;0.001</b> |
| HDL (mg/dl)                         | 39.09±7.25                                                                | 41.16±4.06                                                                   | 1.835  | 0.069            |
| LDL (mg/dl)                         | 106.55±43.00                                                              | 97.78±18.50                                                                  | 1.381  | 0.170            |
| Triglyceride(mg/dl)                 | 137.05±77.05                                                              | 122.17±11.97                                                                 | 1.415  | 0.160            |
| Total Cholesterol (mg/dl)           | 166.89±44.76                                                              | 160.84±17.40                                                                 | 0.930  | 0.355            |
| Serum Creatinine (mg/dl)            | 0.95±0.30                                                                 | 0.79±0.08                                                                    | 3.766  | <b>&lt;0.001</b> |
| eGFR (mL/min/1.73m <sup>2</sup> )   | 83.02±40.32                                                               | 99.23±7.06                                                                   | 2.936  | <b>0.004</b>     |
